# Supplementary material
Source: ML conference proceedings conference paper supplement (https://openaccess.thecvf.com/content/CVPR2025/html/Gao_Unified_Reconstruction_of_CVPR_2025_paper.html)
Supplement: Supplementary file 1 [file Gao_Unified_Reconstruction_of_CVPR_2025_supplemental.zip]

# Supplementary Material: Unified Reconstruction of Static and Dynamic Scenes from Events

Qiyao Gao<sup>1,2,3#</sup> Peiqi Duan<sup>1,2#</sup> Hanyue Lou<sup>1,2</sup> Minggui Teng<sup>1,2</sup>  
Ziqi Cai<sup>1,2</sup> Xu Chen<sup>3</sup> Boxin Shi<sup>1,2 †</sup>

<sup>1</sup> State Key Laboratory for Multimedia Information Processing, School of Computer Science, Peking University

<sup>2</sup> National Engineering Research Center of Visual Technology, School of Computer Science, Peking University

<sup>3</sup> Mechatronics, Automation, and Control Systems Laboratory, University of Washington

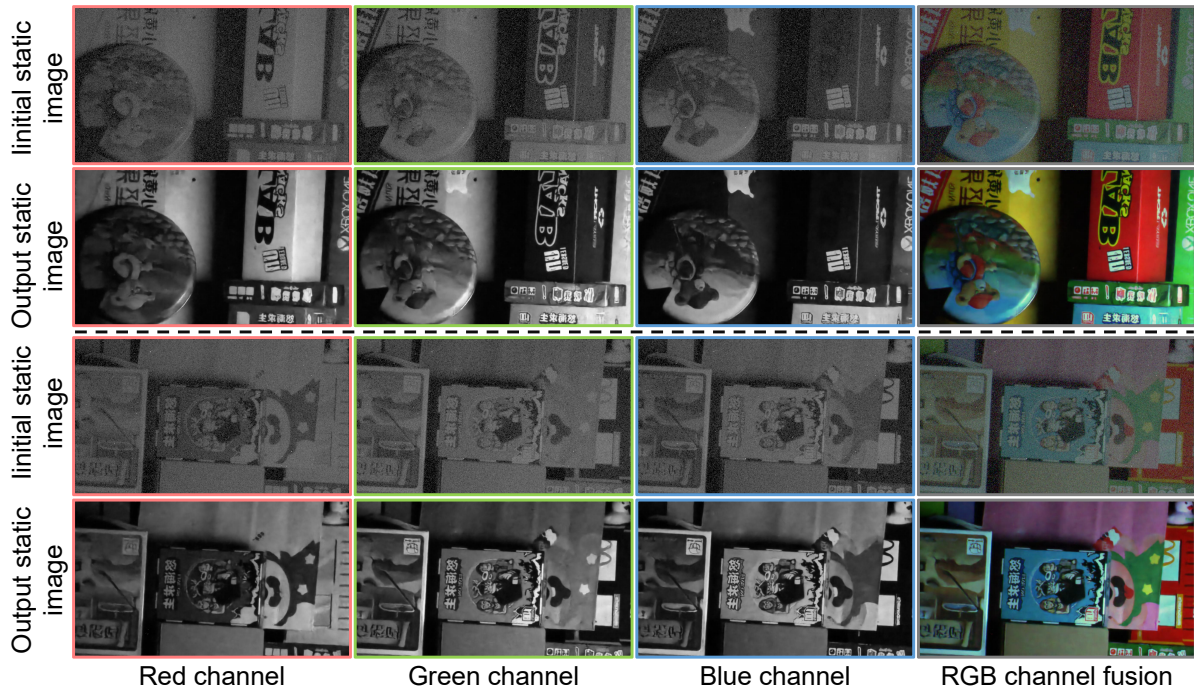

Figure 8. Reconstructed frames of color scenes on E-static dataset. For each scenario, the upper row displays the reconstructed original frame of the three-color channels without denoising, while the lower row shows the denoised frame.

## 7. Results on Video Reconstruction

The performance of reconstructing static and dynamic scene videos is compared in **the video file accompanied by this supplementary material**. E2VID (pretrained) [3], E2VID (retrained), FireNet [4], E2HQV [2], ETNet [5], EVSNN [6] and SSL [1] are chosen as the compared methods.

## 8. Color Static Scene Reconstruction

We achieve color reconstruction of static scenes for the first time. One significant challenge with event cameras is their inability to capture color information. Although the development of the DAVIS color sensor offers a solution, its low spatial resolution and demosaic issues limit its application in certain scenarios. Our approach involves placing color filters in front of the event camera lens to separately capture red, green, and blue color event streams. Through our reconstruction method, we can generate a high-fidelity three-channel intensity map, which is then fused to produce a full-color scene frame, as illustrated in Fig. 8.

# Equal contribution, † Corresponding author

Project page: <https://github.com/gaoqiyao1997/URSEE>

## References

- [1] Federico Paredes-Vallés and Guido CHE De Croon. Back to event basics: Self-supervised learning of image reconstruction for event cameras via photometric constancy. In *Proc. of Computer Vision and Pattern Recognition*, pages 3446–3455, 2021. [1](#)
- [2] Qiang Qu, Yiran Shen, Xiaoming Chen, Yuk Ying Chung, and Tongliang Liu. E2HQP: High-quality video generation from event camera via theory-inspired model-aided deep learning. 2024. [1](#)
- [3] Henri Rebecq, René Ranftl, Vladlen Koltun, and Davide Scaramuzza. High speed and high dynamic range video with an event camera. *IEEE Transactions on Pattern Analysis and Machine Intelligence*, 43(6):1964–1980, 2019. [1](#)
- [4] Cedric Scheerlinck, Henri Rebecq, Daniel Gehrig, Nick Barnes, Robert Mahony, and Davide Scaramuzza. Fast image reconstruction with an event camera. pages 156–163, 2020. [1](#)
- [5] Wenming Weng, Yueyi Zhang, and Zhiwei Xiong. Event-based video reconstruction using transformer. In *Proc. of International Conference on Computer Vision*, 2021. [1](#)
- [6] Lin Zhu, Xiao Wang, Yi Chang, Jianing Li, Tiejun Huang, and Yonghong Tian. Event-based video reconstruction via potential-assisted spiking neural network. In *Proc. of Computer Vision and Pattern Recognition*, 2022. [1](#)
